# Supplementary material for: Is Increased Susceptibility to Balkan Endemic Nephropathy in Carriers of Common GSTA1 (*A/*B) Polymorphism Linked with the Catalytic Role of GSTA1 in Ochratoxin A Biotransformation? Serbian Case Control Study and In Silico Analysis
Source: MDPI journal article supplement (doi:10.3390/toxins6082348), 2014-08-08
Supplement: s1 [file s1]

## Supplementary Information

**Figure S1.** Superposition of glutathione transferase A1 (GSTA1) monomer with or without OTB-SG conjugate (A2). Free/ligand protein structure is colored in cyan.

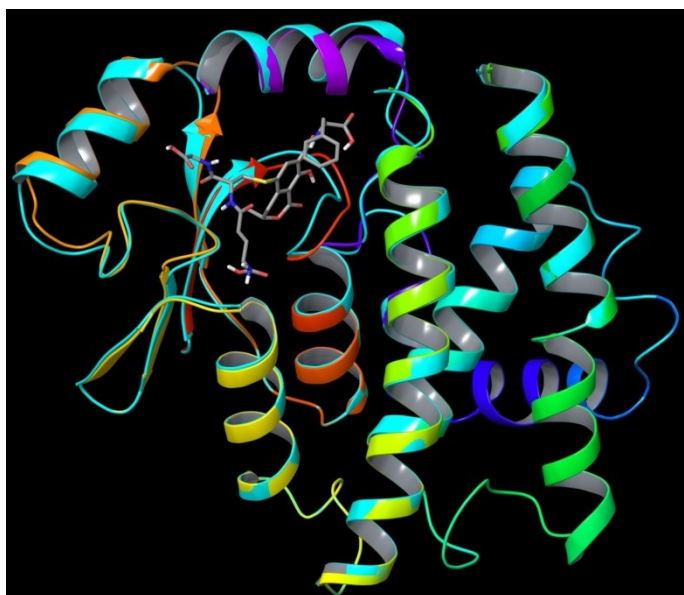

**Figure S2.** Superposition of glutathione transferase A1 (GSTA1) monomer with or without OTB-SG conjugate (B1). Free/ligand protein structure is colored in cyan.

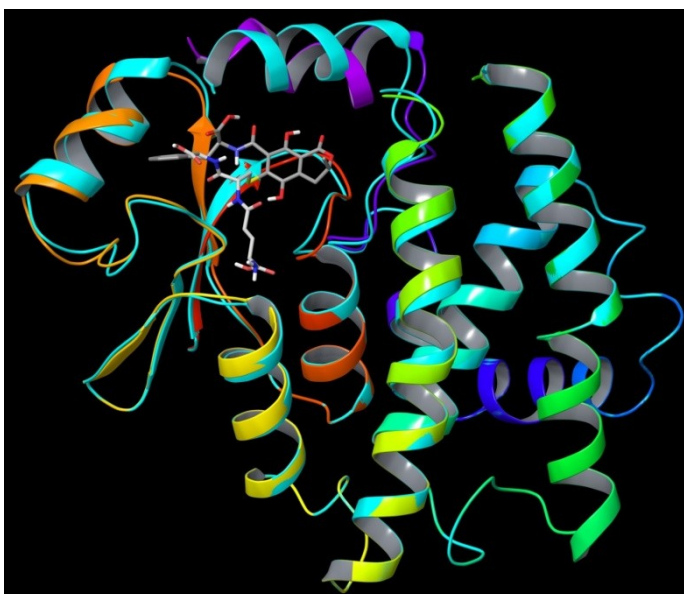

**Figure S3.** Superposition of glutathione transferase A1 (GSTA1) monomer with or without OTB-SG conjugate (B2). Free/ligand protein structure is colored in cyan.

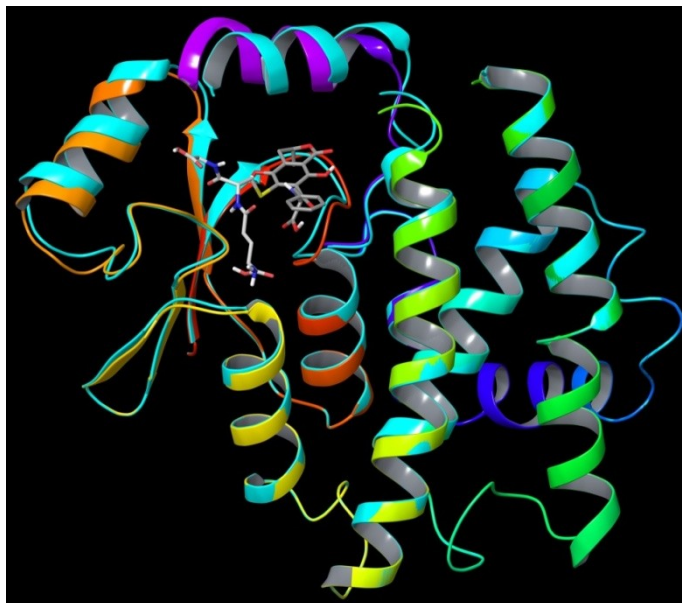

**Table S1.** Calculated total potential energy (kcal/mol) of optimized conjugates A1, A2, B1 and B2.

| Structure | Total potential energy (kcal/mol) |
|-----------|-----------------------------------|
| A1        | -7879.17                          |
| A2        | -8268.93                          |
| B1        | -7760.40                          |
| B2        | -8019.00                          |
